# Supplementary material for: Long-term mutual phase locking of picosecond pulse pairs generated by a semiconductor nanowire laser
Source: Springer Nature journal article supplement (doi:10.1038/ncomms15521), 2017-05-23
Supplement: 41467_2017_BFncomms15521_MOESM536_ESM.pdf [file 41467_2017_BFncomms15521_MOESM536_ESM.pdf]

1

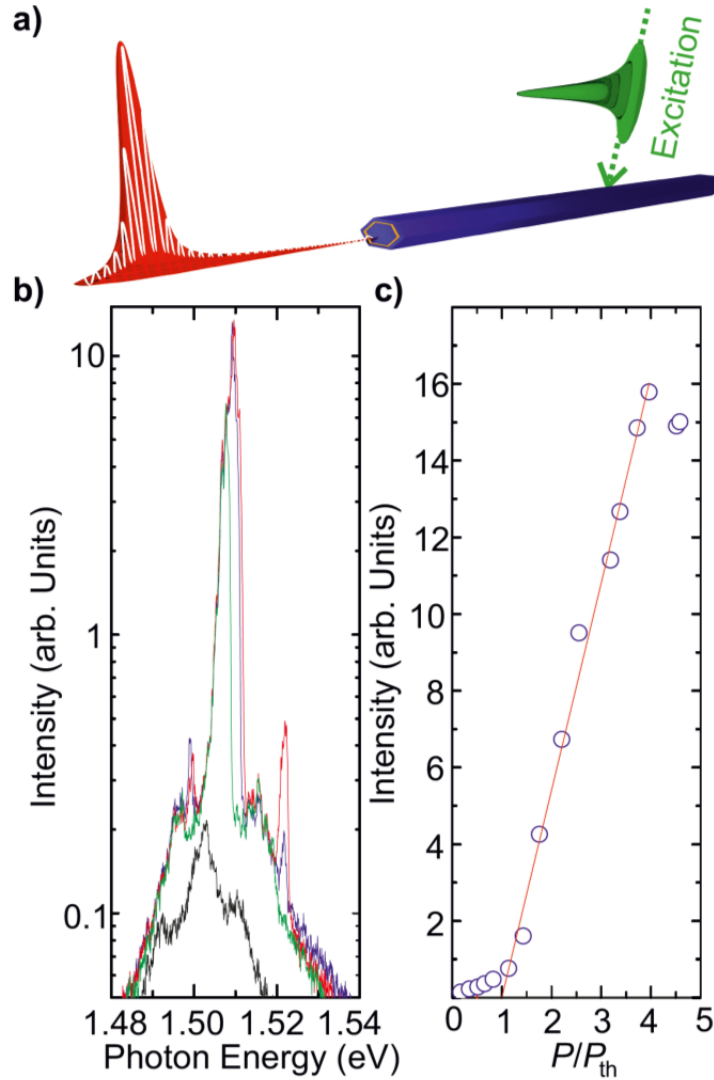

2

3

4

5

6 **Supplementary Figure 1: Nanowire-laser output when excited using a single non-resonant pump**

7 **pulse.** a) Schematic image of a nanowire laser emitting a single pulse. b) Selected spectra recorded with

8 different pump intensity  $P$  normalized to the threshold pump power,  $P_{th}$ , :  $P/P_{th} \sim 0.6$  (black curve),

9  $P/P_{th} \sim 1.9$  (green curve),  $P/P_{th} \sim 4.7$  (blue curve) and  $P/P_{th} \sim 5.3$  (red curve). c) Characteristic

10 Light-in/Light-out curve obtained from the nanowire-laser together with the linear fit (red curve) used to

11 determine the lasing threshold.

12

13

14

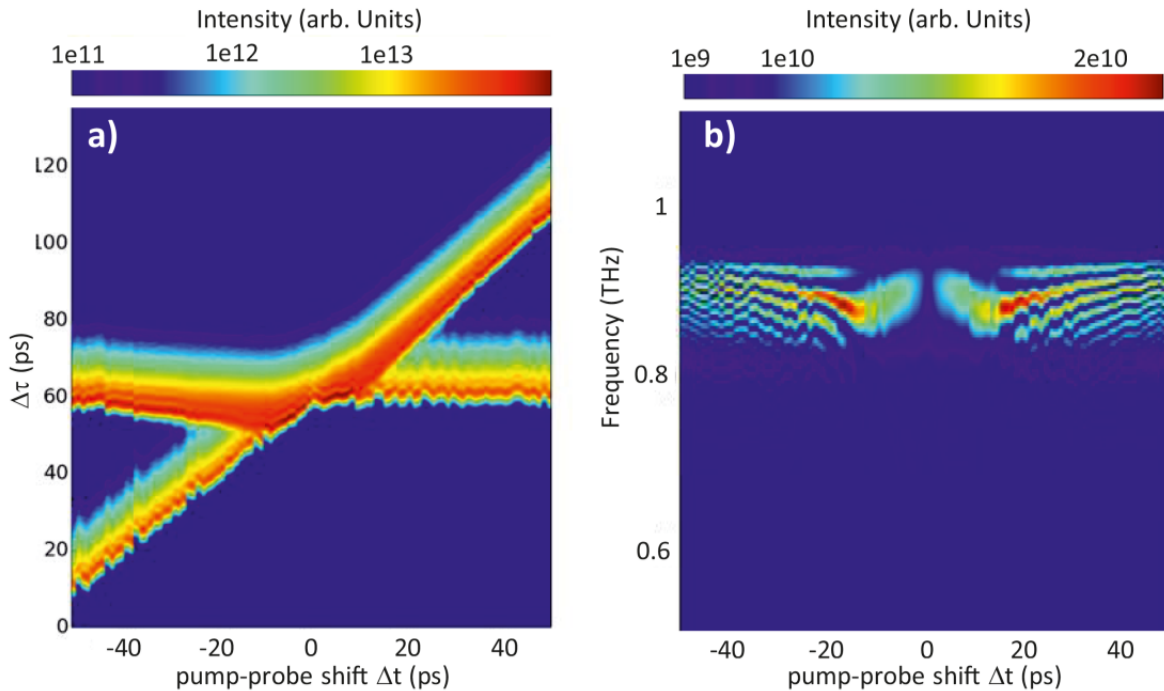

15

16

17 **Supplementary Figure 2 – Impact of saturation of the reservoir state on the emission**

18 (a) Simulation showing intensity data in the time domain for  $P_{probe} = P_{pump} = 4.7P_{th}$  including  
19 reservoir saturation effects (b) Discrete Fourier transform of the time-domain data showing  
20 weaker emission in the region close to  $\pm 10$ ps corresponding to saturation of the reservoir due to  
21 Pauli blocking

22 **Supplementary Note 1: Effect of Pauli-blocking in the reservoir**

23 The input-output characteristics of the nanowire laser when subject to excitation by a single  
24 pump pulse were investigated and are presented in Supplementary Fig. 1. Note the saturation of  
25 the output intensity for  $P_{pump} \geq 4P_{th}$  arising from Pauli blocking in the reservoir state into  
26 which the system is pumped. In the simulation this can be implemented by blocking the carrier  
27 injection into the reservoir as soon as a maximum density is reached. We find that this Pauli  
28 blocking in the reservoir slightly changes the nanowire emission for small pump-probe delay

29 times, as presented in Supplementary Fig.2 in the time domain (a) and in the frequency domain  
30 (b) for a maximum occupation of  $N_2 = 5$ . This is in agreement with the experimentally  
31 observed data shown in the main part of the paper in Fig.1.

32 **Supplementary Note 2: Assigning the temporal ordering of pulses in the Fourier**  
33 **transformed data in Fig 3.**

34 In Fourier transforming the frequency-domain data (Fig. 1) into the time-domain (Fig. 3) one has  
35 to be careful about the assignment of the temporal ordering of the two emitted laser pulses. This  
36 is due to the fact that only positive frequency components are present that fix a relative time but  
37 not the absolute time scale. However, the assignment of the emission attributed to pump and  
38 probe excitation pulses can be linked with pulse-1 and pulse-2 in the emission as follows. In the  
39 experimental data presented in Fig. 3a a positive (negative)  $\Delta t$  corresponds to the weak probe pulse  
40 arriving at the sample after (before) the more powerful pump pulse (defined by the experiment).  
41 When the probe pulse has insufficient power to induce lasing in the nanowire, the emission it  
42 induces is primarily spontaneous and incoherent. As such, it does not have a fixed phase  
43 relationship to the subsequently emitted laser pulse induced by the time delayed stronger pump  
44 pulse and, thereby, no interference is observed in the time integrated emission spectrum. In the  
45 Fourier transform of Fig. 3a, this corresponds to temporal components close to zero-time on the  
46  $\Delta\tau$ -axis as seen at negative  $\Delta t$  in Fig. 3a. In contrast, for positive  $\Delta t$  the powerful pump that  
47 arrives first at the sample does induce lasing; it fixes the phase and the delayed “probe” also  
48 produces lasing with a fixed relative phase due to the pre-excitation. This results in interference  
49 in the time-integrated emission spectrum, leading to the feature observed away from the zero-  
50 time axis of the emitted laser pulse. The probe, therefore, gives rise to the feature labelled pulse-  
51 2 in the Fourier transformed data as seen in the figure, appearing only for positive  $\Delta t$ , i.e. when  
52 the powerful pump excites the sample before the probe. Note, the plot becomes symmetrical  
53 when the power of the probe pulse is increased into the lasing regime as well, since both pump  
54 and probe pulses induce lasing, fix the phase coherence and give rise to interference in the time  
55 integrated spectrum. Therefore, we can unambiguously associate pulse-1 as being emitted first  
56 and pulse-2 second for positive  $\Delta t$ , defining the positive time  $\Delta\tau$  axis in Fig. 3. Note, the  
57 intensity of pulse-2 feature in Fig. 3 reflects only the modulation amplitude of the interference  
58 (see Figs. 1 & 2) and is not interpreted by our experiment.

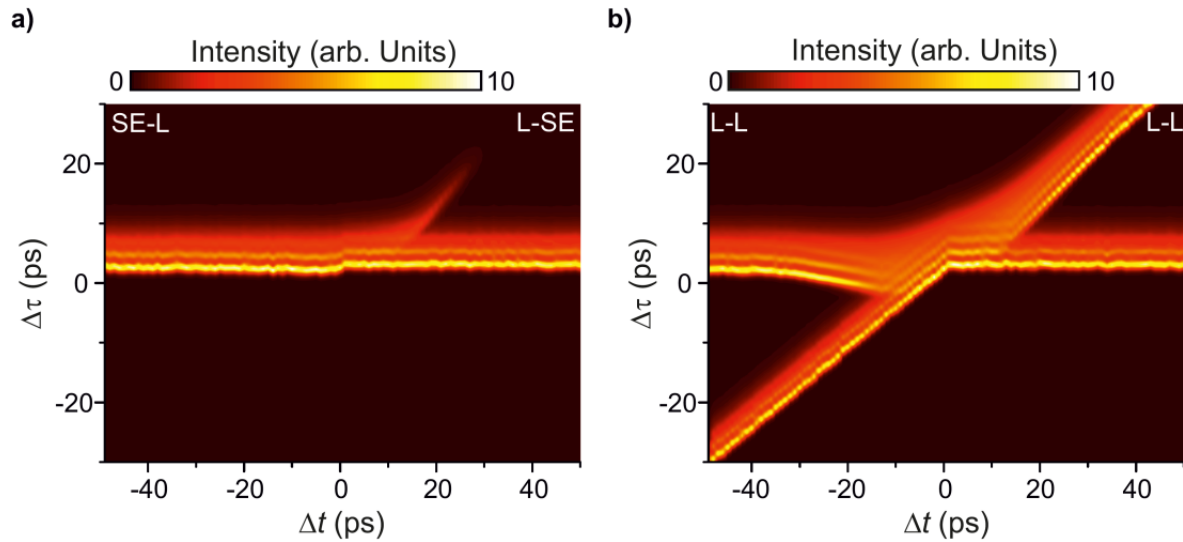

59  
 60 **Supplementary Figure 3 - Direct simulations of the time dependent emission of the NW laser as a**  
 61 **function of the pump-probe delay time  $\Delta t$ .** (a) pump pulse in the lasing regime and the probe pulse in  
 62 the SE regime (L-SE). (b) both, pump and probe pulse in the lasing regime (L-L).

63 To more firmly establish this assertion, Supplementary Fig. 3 shows the direct time traces  
 64 obtained from our simulations for two cases; The first case occurs when  $P_{\text{pump}}$  is in the lasing  
 65 regime and  $P_{\text{probe}}$  is weaker, in the spontaneous emission regime (denoted SE-L or L-SE  
 66 depending on whether the weaker pulse arrives first at the system or vice-versa – (a)). The  
 67 second case demonstrates the lasing-lasing (L-L – (b)) regime where both pulses are sufficiently  
 68 strong to produce lasing. Here, the  $y$ -axis extends over positive and negative times. In  
 69 Supplementary Fig. 3(a) we observe a strong emission pulse close to zero-time delay (horizontal  
 70 line on Supplementary Fig. 3) arising from the pump-pulse, as discussed above, and a weaker  
 71 emission pulse for positive  $\Delta t$  due to emission induced by the probe pulse only after the system  
 72 has previously been pumped. In contrast, for the L-L case we observe strong emission induced  
 73 by both pump and probe pulses. In our experiments, we can interpret the double Fourier  
 74 transformed data in Fig. 3 on the basis of these plots, and the “positive only  $y$ -axis” presented in  
 75 the discrete Fourier transformed data of Fig. 3 corresponds to taking the absolute value of the  $y$ -  
 76 axis of Supplementary Fig. 3 producing results similar to the L-L modeling curve in Fig. 3b.  
 77 Thus, we are sure about the labeling of the emitted pulses in Fig. 3 from the evolution of the  
 78 form of the data with  $P_{\text{pump}}$  and  $P_{\text{probe}}$ , both in experiment and theory.
